# Supplementary material
Source: publisher site journal article supplement (https://www.dovepress.com/article/411335)
Supplement: Supplementary file 1 [file get_supplementary_file.php]

| **Supplementary Table 1: Summary of Risk Factors of Workplace Violence in Healthcare Settings Identified from Systematic Review** | | | | |
| --- | --- | --- | --- | --- |
| **No** | **Author (Year) / Country** | **Study Design** | **Study Population (n)** | **Workplace Violence Risk Factors** |
| 1. | Spelten et al (2020)77 / Australia | Qualitative Study | Nurses (n=20) | - Dealing with patients with mental health issues - Dealing with drug-induced patients - Frustrated, stressed, helpless, or entitled family members - Patients’ unfamiliarity with the health care system - Young adults’ patient - Waiting times - Cultural barriers - Young and less experienced staff - Poor support at the workplace - The negative image in social media |
| 2 | Kumari et al (2020)23 / global | Review article | Doctors | Patient-Related Factors   - Demographic - Male - Lower education status - Higher social status - Low impulse control - Mental disorders - Influence of drugs and alcohol - Personality: Style of control and dominance - Poor previous experience - Patient Dissatisfaction - The unexpected high cost of services - Poor treatment adherence - Legal cases - Patient death   Doctor Related Factors   - Demographic - Being female - Lower education status - Less experience - Shift worker - Experiencing emotional distress: Stress, anxiety - Personality Traits - Low self-esteem - High Neuroticism - Low agreeableness - Poor communication skills - Rude and indifferent behavior - Inability to de-escalate patient’s feeling - Being unprepared   Organizational Factors   - Department - Psychiatric - Emergency - Poor administration - Lack of resources (equipment and medicine) - Overcrowding - Long waiting time - Delay in service - Workload - Inadequate skill mix - Lack of security forces - Poor Safety culture - Lack of protocol or guidelines - Discouragement on reporting - Poor staff empowerment - Poor shared governance - No penalty for aggressors - No staff training   Societal Factors   - Language barrier - Cultural barrier - Lack of respect for authority - Patient’ distrust - Negative media image - Lack of policies |
| 3. | Kaur et al (2020)63 / India | Cross-sectional | Doctors (n=617) | - Deterioration or non-improvement of a patient’s condition based on actual event or perception. - Feeling of receiving wrong treatment - Delay in receiving treatment - Patient’s death - Client’s unrealistic demands - Cost and fee-related issues - Poor administration or infrastructure, like, lack of bed, investigations, treatment, and long waiting hours |
| 4. | Hossain et al (2020)25 / India | Systematic review | Healthcare professionals (n=2,849) | - Patient-provider communication issues - Lack of satisfaction among the patients - Healthcare provider’s fewer years of experience - Inadequate resources and poor infrastructure - Long waiting hours - Excessive workload and overcrowding - Issues related to billing and medical expenses - Lacking in security measures - Socio-behavioral issues among the healthcare providers and patients - Low level of client’s literacy - Death of the patient - Socio-political influences of the patients - Negative reports in mass media |
| 5. | Tian et al (2020)2 / China | Cross-sectional study | Nurses (n=2,750) and doctors (n=956) | - Male worker - Work in shift - A senior professional title - Bachelor’s degree graduate - Working time of more than 50 h weekly - Secondary-level hospital workers |
| 6. | Du et al (2020)64 / China | Cross-sectional study | Patients (n=5,556) | Patients who were more likely to report “violence” were:   - Male (OR = 1.81, p < 0.05) - High-income earners (OR = 3.71, p < 0.05) - Reported lower life satisfaction (OR = 1.40, p < 0.05) |
| 7. | Deniz & Yüksel (2020)65 / Turkey | Cross-sectional study | Community members (n=545) | - Impatience of the patients and patient relatives - Inadequate information is given to the patient and patient relatives - Long waiting periods of the patients - Lack of education of the patients and patient relatives - Inadequate number of health care workers - Ignorance of the patients - Inadequate number of medical devices and equipment - Impoliteness of the health care workers to the patients - Failure of the health care workers in performing their duty - News and publications in media against health care workers |
| 8. | Davey et al (2020)78 / India | Qualitative study | Physicians (n=47), nurses (n=10), and paramedics (n=5) | - High patient volumes - Long periods of waiting - Communication challenges - Unanticipated outcomes such as patients with severe illness or death. - Decreased levels of health literacy among patients - Financial stressors of paying for medical care. - Intoxication - Perpetuation based on media/prior events |
| 9. | Ariffin (2020)5 / Malaysia | Cross-sectional study | Healthcare workers (n=481) | - Outpatient clinic worker (AOR=6.31, 95% CI 1.9,20.98) - Maternal and child health clinic worker (AOR=5.02, 95% CI 1.37,18.4) - Environmental Health Officer (AOR=3.75, 95% CI 1.287,10.930) - Weekends or public holidays work (AOR=3.01, 95% CI = 1.64-5.53) |
| 10. | Yenealem et al (2019)66 / Ethiopia | Cross-sectional study | Healthcare workers (n=553) | - Working at emergency departments (AOR = 3.99, 95% CI 1.49,10.73) - Working at shifts (AOR = 1.98, 95%, CI 1.28,3.03) - Short experiences (AOR = 3.09, 95% CI 1.20,7.98) - Being nurse or midwife (AOR = 4.06, 95% CI 1.20,13.74) |
| 11. | Yang et al (2019)67 / China | Cross-sectional study | Healthcare workers (n=4862) | - Male healthcare workers- - physical violence (AOR=2.18, 95% CI 1.53,3.12) - threats (AOR=1.33, 95% CI 1.10, 1.62) - Yi Nao (AOR=1.42, 95% CI 1.22,1.66) - Healthcare workers in secondary hospitals - physical violence (AOR=3.29, 95% CI 2.21,4.89) - threats (AOR=1.61, 95% CI 1.32,1.98) - Yi Nao (AOR=2.47, 95% CI 2.10,2.91) |
| 12. | Seun-Fadipe et al (2019)68 / Nigeria | Cross-sectional study | Healthcare workers (n=380) | - Younger age of worker (AOR=2.513, 95% CI 1.227,5.146) - Female worker (AOR=1.657, 95% CI 1.015,2.706) - Working in psychiatry department (AOR=11.1180, 95% CI 2.029,61.604) |
| 13. | Sachdeva et al (2019)69 / India | Cross-sectional study | Doctors (n=123) and nurses (n=112) | - Less age group (*P* < 0.05) - Male gender (*P* < 0.05) - Less experienced (*P* < 0.05) - Junior residents and nurses (*P* < 0.05) |
| 14. | Rusdi et al (2019)70 / Malaysia | Cross-sectional study | Healthcare workers (n=214) | - Working in the shift will have 16.01 times the odds to be a victim of workplace violence (95% CI: 1.61, 159.04, *p* value = 0.018). |
| 15. | Raveel & Schoenmakers (2019)24 / global | Systematic Review | Doctors | Workplace design   - Poor border between patient and staff only area - Noisy, overcrowded, and uncomfortable waiting areas - Inadequate access to amenities, exits and toilets - Availability of blind spots area without surveillance and poor lighting - Furnishings that are unsecured that might be used as weapons   Policies and work practices   - Working alone - Long waiting times - Inadequacy in staffing levels or skills mix - Poor customer services - Poor safety culture - Lacking in follow-up of violent episodes by management - Lacking in workplace violence-prevention programs - Lacking in shared governance and staff empowerment - Ineffective mechanisms control patients with repeated behaviors of issue - Lacking in de-escalation techniques training among staffs - Lacking in training on causes and management of violent behavior associated with pathologies. - The mismatch between services offered and expectations - Physical restraints use - Presence of valuable items, drugs, or cash at workplace - Availability of weapons - Denied prescription or a disability/sickness certificate - House visits/on-call shifts   Physiological disturbances or imbalances:   - Encephalopathy - Metabolic derangement: hyponatraemia, hypocalcemia, hypoglycemia - Hypoxia - Head trauma - Seizure (postictal) - Encephalitis, meningitis, infection - Thyroid disease - Toxic levels of medications - Exposure to environmental factors - Substance abuse or active intoxication - Past history of bad experience dealing with healthcare services - Psychosocial stressors - Previous violence - Personality, interpersonal style of control or dominance - Perception of being treated unfairly, not being listened, or not being respected. - Psychiatric disorder - Situational control loss - Issues and complexity in family relationships - Costs of healthcare which are too high or unexpected   Physician factors   - Lack of training and education on managing violence - Unprepared - Inadequate medical and communication skills - Fewer years of working experience - Physicians own anxiety, anger, emotions, countertransference - Interpersonal style like assertive style - Concerns about licensing or legal matters - Overworking - Personality traits: low conscientiousness, high neuroticism, low extroversion, high negative affect, low agreeableness, low self-esteem   Societal causes/social context   - Unemployment, poverty, and social dislocation - Patients felt they have a greater sense of entitlement causing reduced respect for authority - ‘Bowling for Columbine effect’ - Cultural differences - Language barriers - Population density |
| 16. | Olgun & Adibelli (2019)71 / Turkey | Cross-sectional study | Patients’ relatives (n=189) | - Ignorance of healthcare workers - Patient being unjustly treated - Patient claiming right - Workers not doing the duty well - Long waiting time - Heavy hospital works - Inadequacy of the beds - Impatience of patient relatives - News in the media |
| 17. | Nowrouzi-Kia et al (2019)81 / global | Systematic Review and Metanalysis | Doctors | - Remote areas of working - Inadequate number of staffs - Patients/visitors stress - Lack of security measures - Inadequate preventative measures - Insufficient organizational resources - Lack of management support - Doctors are used as scapegoat - Overdemanding patients - Lack of communication skills - Poor hospital management causing staffs to unable to join training sessions on violence prevention - Inexperience - Higher burdens of workload |
| 18. | Liu et al (2019)8 / global | Metanalysis | Healthcare workers (n=331,544) | - Shift work (AOR=1.91, 95% CI 1.42,2.56) - Older workers (AOR=0.86, 95% CI 0.76,0.97) - Longer workings hours per week (AOR=2.24, 95% CI 1.27,3.97) |
| 19. | Karimah et al (2019)72 / Malaysia | Cross-sectional study | Healthcare workers (n=265) | - Older age (AOR=0.86, 95% CI 0.766,0.965) - Longer working years were at higher risk to have workplace violence (AOR=2.099, 95% CI 1.053,4.183) - Workers from other professional groups (AOR=0.106, 95% CI 0.029,0.387) |
| 20. | Beattie et al (2019)79 / Australia | Qualitative study | Managers, directors, health/safety staff, nurses, and educators (n=99) | - The client perceived being “neglected” - The frustration of dealing with health service staff and procedures - The death of a loved-one is unpredictable - Psychiatric history of the patient - Poor communication - Previous client trauma |
| 21. | Zainal et al (2018)73 / Malaysia | Cross-sectional study | Doctors and nurses (n=126) | - Working in the Accident and Emergency (A&E) Department was 17 times more likely to report workplace violence than those working in Pediatric Department - For every 1 year younger, respondents were 5 times more likely to experience workplace violence controlling for other factors |
| 22. | Ramacciati et al (2018)80 / Italy | Qualitative study | Emergency nurses (n=1,100) | Nurses Factors   - Perception of violence part of the job - Underreporting of workplace violence - Weak communication skills among nurses - Perception of non-urgent patients coming to the emergency department   Patient factors   - The bad media image of the nurse - The nurse not being seen as an important role in society - Anger toward systems - Bad manners displayed by patients and relatives   Organizational Factors   - The disinterest of managers and leaders in workplace violence - Non-protection in term of safety - Under-estimation of workplace violence by managers - Understaffing   Environment Factor   - Suitable environments with adequate structural measures |
| 23. | Hedayati et al (2018)15 / Iran | Cross-sectional study | Emergency residents (n=280) | - Lack of information about duties of residents among people - Lack of security facilities - Lack of training courses regarding violence prevention - Taking psychedelic drugs or alcohol by patients - Lack of information regarding legal issues |
| 24. | D'Ettorre et al (2018)82 / global | Review article | Healthcare workers | Patient Factors   - Dementia - Schizophrenia - Anxiety - Acute stress reaction - Suicidal ideation - Alcohol - Drug intoxication   Factors within the Emergency Departments   - Inadequate HCW-patient relationship - High anxiety level among the staff - Poorer perceived safety climates - High job demands - Long waiting times for patients - Age less than 30 years - Female gender   Organizational factors   - Excessive service volume - High-stress situations, - Overload of physicians in daily practice |
| 25. | Arnetz et al (2018)74 / United States of America | Cross-sectional study | Hospital workers (n=446) | Interpersonal conflict   - Verbal violence (AOR=1.49, 95% CI 1.04,2.12)   Violence prevention climate   - Verbal violence (AOR=0.48 95% CI 0.36,0.65) - Physical violence (AOR=0.60 95% CI 0.45-0.85) |
| 26. | Al-Azzam et al (2018)75 / Jordan | Cross-sectional study | Mental health nurses (n=134) | Administration-related factors   - Lack of assertive legislations - Ineffective actions in dealing with the violent incidents - Lack of resources   Staff-related factors   - Inadequate staffing - Lack of communication skills - Inexperienced staff   Patients-related factors   - Patients’ psychiatric diagnosis - History of violence - History of drug abuse |
| 27. | Ahmad et al (2015)83 / global | Review | Nurses | Patient, patient’s family, or visitor risk factor   - Male - Medical diagnosis - Alcohol and drug abuse - The dissatisfaction of patients with the quality of care - Unrealistic expectation of care - Anxious and stressed patients or family - Younger age - Illiteracy or language barrier - Previous impression about the poor quality of care - Low socioeconomic status - Refusing provided care - Misconceptions about staff's behavior   Nurse’s Factor   - Gender - Lower experience - Educational level - Stress at work - Lack of training - Lack of effective communications - Believing violence part of the job - Lack of ethical values   Organizational Factor   - Shift work - Lengthy waiting time - Lack of resources -staff/equipment - Crowding of patient - Workload on staff - Lack of policies - Lack of security measures - Poor management of incident of WPV - Lack of managerial supports - Underreporting of WPV incidents - Inappropriate environments for - Providing health care services |
| 28. | AbuAlRub & Al Khawaldeh (2014)76 / Jordan | Cross-sectional study | Nurses (n=396) and physicians (n=125) | Administrative factors   - Absence of assertive legislations - Ineffective dealing with the violent incidents that occurred - The long working shifts - Shortage of staff - Lack of sources such as insufficient - Equipment and instruments - Inappropriate work environments for providing healthcare services such as demanding workload, lighting, noise, heat, access to food, cleanliness, and little privacy services   Staff factors   - Inadequate staffing lead to increased workload - Lack of communication skills - Poor quality care - The inexperienced staff   Client factors   - Tension and anxiety - Having previous bad impressions on health care prior to admission - Stress in life and lacking in health insurance   Societal Factors   - Nursing profession has negative image - Ignorance, traditions, and tribal culture   Security Factors   - Security staffs that are unqualified or inexperienced - Poor control of visiting time - Public and visitors’ have easy accessibility |
